# Supplementary material
Source: publisher figshare collection journal article supplement (https://acs.figshare.com/ndownloader/files/21781911)
Supplement: Supplementary file 1 [file 21781911]

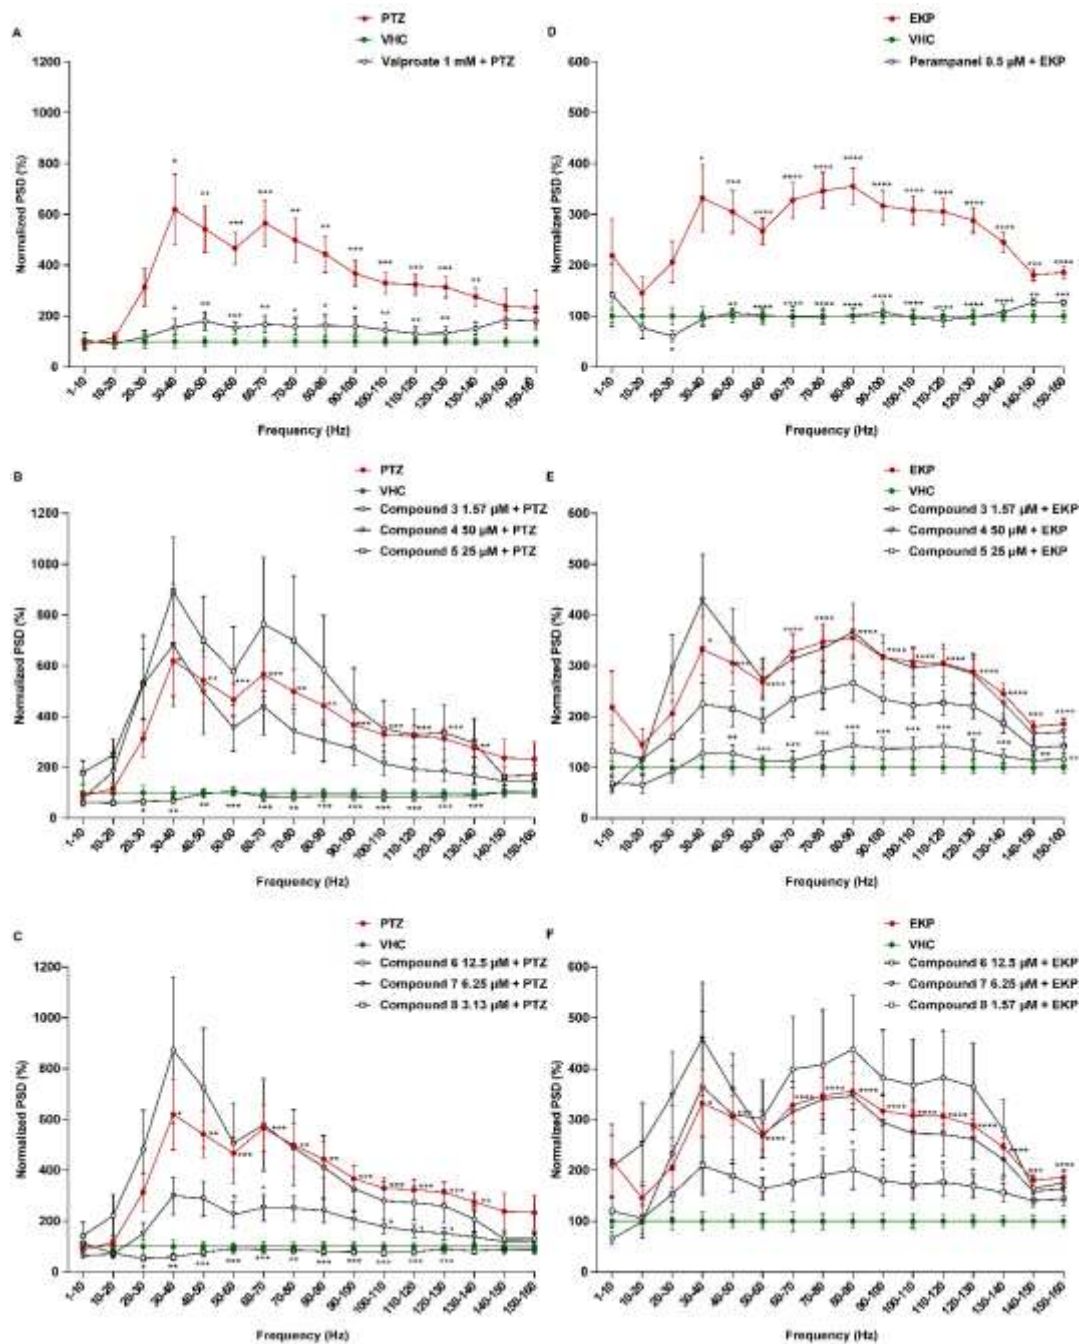

**Supplementary Figure 1. Electrophysiological antiseizure activity (PSD analysis) of structural analogues in the PTZ/EKP zebrafish models.** The power spectral density (PSD) ranging from 0-160 Hz is normalized against the vehicle (VHC) control, and the data are plotted as mean ( $\pm$  SEM) PSD per 10 Hz (A-F). Number of larvae per condition:  $n = 16-19$  for the VHC/PTZ/EKP group,  $n=12-17$  for the valproate/perampanel+PTZ/EKP group,  $n=10$  for analogues+PTZ/EKP. Statistical analysis: two-way ANOVA with Bonferroni posttests, PTZ/EKP control in comparison to VHC group, valproate/perampanel/analogues+PTZ/EKP group in comparison to PTZ/EKP control. Outliers were identified and removed based on the Iterative Grubbs ( $\alpha = 0.1$ ). Significance levels: \* $p \leq 0.05$ , \*\* $p \leq 0.01$ , \*\*\* $p \leq 0.001$ , \*\*\*\* $p \leq 0.0001$ .
